# Supplementary material for: Organic matter cycling along geochemical, geomorphic, and disturbance gradients in forest and cropland of the African Tropics – project TropSOC database version 1.0
Source: Copernicus journal article supplement (doi:10.5194/essd-13-4133-2021), 2021-08-25
Supplement: Supplementary file 1 [file essd-13-4133-2021-supplement.zip]

## TropSOC Database

### 2.1.10. Forest – Vegetation – Root biomass aggregated to annual values

When using these data, please cite the database and the key publication in ESSD:

Doetterl, S.; Bukombe, B.; Cooper, M.; Kidinda, L.; Muhindo, D.; Reichenbach, M.; Stegmann, A.; Summerauer, L.; Wilken, F.; Fiener, P. (2021): TropSOC Database. V. 1.0. GFZ Data Services.

<https://doi.org/10.5880/fidgeo.2021.009>

Licence: Creative Commons Attribution 4.0 International ([CC BY 4.0](https://creativecommons.org/licenses/by/4.0/))

Doetterl S., Asifiwe R.K., Baert G., Bamba F., Bauters M., Boeckx P., Bukombe B., Cadisch G., Cizungu L.N., Cooper M., Hoyt A., Kabaseke C., Kalbitz K., Kidinda L., Maier A., Mainka M., Mayrock J., Muhindo D., Mujinya B.B., Mukotanyi, S.M., Nabahungu L., Reichenbach M., Rewald B., Six J., Stegmann A., Summerauer L., Unseld R., Vanlauwe B., Van Oost K., Verheyen K. Vogel C., Wilken F., Fiener P. Organic matter cycling along geochemical, geomorphic and disturbance gradients in forests and cropland of the African Tropics - Project TropSOC Database Version 1.0. *Earth System Science Data*. <https://doi.org/10.5194/essd-2021-73>, 2021.

#### Introduction

The dataset comprises a unique plot identifier, followed by 18 variables that provide data regarding the root biomass aggregated for annual values at the plot level for TropSOC's forest plots. Missing values are indicated by -9999.

#### Data structure

| No. | Variable     | Explanation                                                                                                                   | Unit                |
|-----|--------------|-------------------------------------------------------------------------------------------------------------------------------|---------------------|
| 1   | plotID       | unique identifier of each plot and point where data were collected                                                            | -                   |
| 2   | layer        | soil layer where the sample was collected with 0 = "O horizon"; 1 = 0 – 10 cm; 2 = 10 – 20 cm; 3 = 20 – 30 cm; 4 = 30 - 50 cm | -                   |
| 3   | o_hor        | depths of O horizon                                                                                                           | cm                  |
| 4   | min_fr_liv   | minimum living fine roots (< 2 mm)                                                                                            | mg cm <sup>-3</sup> |
| 5   | max_fr_liv   | maximum living fine roots (< 2 mm)                                                                                            | mg cm <sup>-3</sup> |
| 6   | mean_fr_liv  | mean living fine roots (< 2 mm)                                                                                               | mg cm <sup>-3</sup> |
| 7   | sd_fr_liv    | standard deviation of mean living fine roots (< 2 mm)                                                                         | mg cm <sup>-3</sup> |
| 8   | min_fr_dead  | minimum dead fine roots (< 2 mm)                                                                                              | mg cm <sup>-3</sup> |
| 9   | max_fr_dead  | maximum dead fine roots (< 2 mm)                                                                                              | mg cm <sup>-3</sup> |
| 10  | mean_fr_dead | mean dead fine roots (< 2 mm)                                                                                                 | mg cm <sup>-3</sup> |
| 11  | sd_fr_dead   | standard deviation of mean dead fine roots (< 2 mm)                                                                           | mg cm <sup>-3</sup> |
| 12  | min_cr_liv   | minimum living coarse roots (> 2 mm)                                                                                          | mg cm <sup>-3</sup> |
| 13  | max_cr_liv   | maximum living coarse roots (> 2 mm)                                                                                          | mg cm <sup>-3</sup> |
| 14  | mean_cr_liv  | mean living coarse roots (> 2 mm)                                                                                             | mg cm <sup>-3</sup> |
| 15  | sd_cr_liv    | standard deviation of mean living coarse roots (> 2 mm)                                                                       | mg cm <sup>-3</sup> |
| 16  | min_cr_dead  | minimum dead coarse roots (> 2 mm)                                                                                            | mg cm <sup>-3</sup> |
| 17  | max_cr_dead  | maximum dead coarse roots (> 2 mm)                                                                                            | mg cm <sup>-3</sup> |
| 18  | mean_cr_dead | mean dead coarse roots (> 2 mm)                                                                                               | mg cm <sup>-3</sup> |
| 19  | sd_cr_dead   | standard deviation of mean dead coarse roots (> 2 mm)                                                                         | mg cm <sup>-3</sup> |
| 20  | no           | total number of observations considered in the calculations                                                                   | -                   |

### **Methods**

This data set comprises an annual aggregation at the plot level of root biomass data (*218\_root\_biomass.csv*) described in detail in *218\_root\_biomass.pdf*.

### **Acknowledgment**

TropSOC was funded via the Emmy-Noether-Program of the German Research Foundation (project ID 387472333).
