# Supplementary material for: Organic matter cycling along geochemical, geomorphic, and disturbance gradients in forest and cropland of the African Tropics – project TropSOC database version 1.0
Source: Copernicus journal article supplement (doi:10.5194/essd-13-4133-2021), 2021-08-25
Supplement: Supplementary file 2 [file essd-13-4133-2021-supplement.zip]

## TropSOC Database

### 2.6. Forest – Parent Material

When using these data, please cite the database and the key publication in ESSD:

Doetterl, S.; Bukombe, B.; Cooper, M.; Kidinda, L.; Muhindo, D.; Reichenbach, M.; Stegmann, A.; Summerauer, L.; Wilken, F.; Fiener, P. (2021): TropSOC Database. V. 1.0. GFZ Data Services.

<https://doi.org/10.5880/fidgeo.2021.009>

Licence: Creative Commons Attribution 4.0 International ([CC BY 4.0](https://creativecommons.org/licenses/by/4.0/))

Doetterl S., Asifiwe R.K., Baert G., Bamba F., Bauters M., Boeckx P., Bukombe B., Cadisch G., Cizungu L.N., Cooper M., Hoyt A., Kabaseke C., Kalbitz K., Kidinda L., Maier A., Mainka M., Mayrock J., Muhindo D., Mujinya B.B., Mukotanyi, S.M., Nabahungu L., Reichenbach M., Rewald B., Six J., Stegmann A., Summerauer L., Unseld R., Vanlauwe B., Van Oost K., Verheyen K. Vogel C., Wilken F., Fiener P. Organic matter cycling along geochemical, geomorphic and disturbance gradients in forests and cropland of the African Tropics - Project TropSOC Database Version 1.0. *Earth System Science Data*. <https://doi.org/10.5194/essd-2021-73>, 2021.

### Introduction

The dataset comprises a unique sample identifier, a comment regarding rock type, 62 variables measured to quantify elemental concentrations in unweathered rock samples of TropSOC's soil parent material using total combustion, ICPOES and XRF. Missing values are indicated by -9999.

### Data structure

| No. | Variable          | Explanation                                                                                                                                                        | Unit |
|-----|-------------------|--------------------------------------------------------------------------------------------------------------------------------------------------------------------|------|
| 1   | sampleID          | unique identifier of any soil or vegetation sample taken in the field                                                                                              | -    |
| 2   | rock_type_comment | first classification based on field samples; information partly missing when unclear; partly a "?" indicates somewhat unclear / uncertain classification estimates | -    |
| 3   | N                 | nitrogen content in mass percent (total combustion)                                                                                                                | %    |
| 4   | C                 | organic carbon content in mass percent (total combustion)                                                                                                          | %    |
| 5   | Ca_ICPOES         | mass percent of Ca in the bulk soil                                                                                                                                | %    |
| 6   | Cu_ICPOES         | mass percent of Cu in the bulk soil                                                                                                                                | %    |
| 7   | K_ICPOES          | mass percent of K in the bulk soil                                                                                                                                 | %    |
| 8   | Mg_ICPOES         | mass percent of Mg in the bulk soil                                                                                                                                | %    |
| 9   | Na_ICPOES         | mass percent of Na in the bulk soil                                                                                                                                | %    |
| 10  | P_ICPOES          | mass percent of P in the bulk soil                                                                                                                                 | %    |
| 11  | Ti_ICPOES         | mass percent of Ti in the bulk soil                                                                                                                                | %    |
| 12  | Zn_ICPOES         | mass percent of Zn in the bulk soil                                                                                                                                | %    |
| 13  | Al_ICPOES         | mass percent of Al in the bulk soil                                                                                                                                | %    |
| 14  | Fe_ICPOES         | mass percent of Fe in the bulk soil                                                                                                                                | %    |
| 15  | Mn_ICPOES         | mass percent of Mn in the bulk soil                                                                                                                                | %    |
| 16  | Na_XRF            | mass percent of Na in the bulk soil                                                                                                                                | %    |
| 17  | Mg_XRF            | mass percent of Mg in the bulk soil                                                                                                                                | %    |
| 18  | Al_XRF            | mass percent of Al in the bulk soil                                                                                                                                | %    |

|    |        |                                     |   |
|----|--------|-------------------------------------|---|
| 19 | Si_XRF | mass percent of Si in the bulk soil | % |
| 20 | P_XRF  | mass percent of P in the bulk soil  | % |
| 21 | S_XRF  | mass percent of Si in the bulk soil | % |
| 22 | Cl_XRF | mass percent of Cl in the bulk soil | % |
| 23 | K_XRF  | mass percent of K in the bulk soil  | % |
| 24 | Ca_XRF | mass percent of Ca in the bulk soil | % |
| 25 | Sc_XRF | mass percent of Sc in the bulk soil | % |
| 26 | Ti_XRF | mass percent of Ti in the bulk soil | % |
| 27 | Cr_XRF | mass percent of Cr in the bulk soil | % |
| 28 | Mn_XRF | mass percent of Mn in the bulk soil | % |
| 29 | Fe_XRF | mass percent of Fe in the bulk soil | % |
| 30 | Co_XRF | mass percent of Co in the bulk soil | % |
| 31 | Ni_XRF | mass percent of Ni in the bulk soil | % |
| 32 | Cu_XRF | mass percent of Cu in the bulk soil | % |
| 33 | Zn_XRF | mass percent of Zn in the bulk soil | % |
| 34 | As_XRF | mass percent of As in the bulk soil | % |
| 35 | Se_XRF | mass percent of Se in the bulk soil | % |
| 36 | Br_XRF | mass percent of Br in the bulk soil | % |
| 37 | Rb_XRF | mass percent of Rb in the bulk soil | % |
| 38 | Sr_XRF | mass percent of Sr in the bulk soil | % |
| 39 | Y_XRF  | mass percent of Y in the bulk soil  | % |
| 40 | Zr_XRF | mass percent of Zr in the bulk soil | % |
| 41 | Mo_XRF | mass percent of Mo in the bulk soil | % |
| 42 | Ag_XRF | mass percent of Ag in the bulk soil | % |
| 43 | Cd_XRF | mass percent of Cd in the bulk soil | % |
| 44 | In_XRF | mass percent of In in the bulk soil | % |
| 45 | Sn_XRF | mass percent of Sn in the bulk soil | % |
| 46 | Sb_XRF | mass percent of Sb in the bulk soil | % |
| 47 | Te_XRF | mass percent of Te in the bulk soil | % |
| 48 | I_XRF  | mass percent of I in the bulk soil  | % |
| 49 | Cs_XRF | mass percent of Cs in the bulk soil | % |
| 50 | Ba_XRF | mass percent of Ba in the bulk soil | % |
| 51 | La_XRF | mass percent of La in the bulk soil | % |
| 52 | Ce_XRF | mass percent of Ce in the bulk soil | % |
| 53 | Pr_XRF | mass percent of Pr in the bulk soil | % |
| 54 | Nd_XRF | mass percent of Nd in the bulk soil | % |
| 55 | Hf_XRF | mass percent of Hf in the bulk soil | % |
| 56 | Ta_XRF | mass percent of Ta in the bulk soil | % |
| 57 | W_XRF  | mass percent of W in the bulk soil  | % |
| 58 | Au_XRF | mass percent of Au in the bulk soil | % |
| 59 | Hg_XRF | mass percent of Hg in the bulk soil | % |
| 60 | Tl_XRF | mass percent of Tl in the bulk soil | % |
| 61 | Pb_XRF | mass percent of Pb in the bulk soil | % |
| 62 | Bi_XRF | mass percent of Bi in the bulk soil | % |

|    |        |                                     |   |
|----|--------|-------------------------------------|---|
| 63 | Th_XRF | mass percent of Th in the bulk soil | % |
| 64 | U_XRF  | mass percent of U in the bulk soil  | % |

## Methods

**Nitrogen and Carbon [Variable 3 and 4]:** Bulk C and N content of rock samples was measured using 1 g of ground subsamples with a dry combustion analyzer (Variomax CN, Elementar GmbH, Hanau, Germany) and a measuring range of 0.2 - 400 mg g<sup>-1</sup> soil (to determine the absolute C or N mass in a sample) and a reproducibility of < 0.5 % (relative deviation). Recovery rates exceeding 97 % and 91 % were obtained across all samples for the rock masses as well as C and N concentrations. None of the soil samples showed any reaction when treated with 10 % HCl and are therefore considered free of carbonates. Consequently, total soil CN content is interpreted as fossile organic carbon (FOC) and fossile organic nitrogen (FON) content. This interpretation is also applied to samples showing geogenic C residues from sediment sources.

**Total element composition based on ICP-OES measurements [variables 5 to 15 of the Data structure table]:** Total elemental composition was determined using inductively coupled plasma optical emission spectrometry (ICP-OES) (5100 ICP-OES Agilent Technologies, USA) for the determination of calcium (Ca), magnesium (Mg), sodium (Na), potassium (K), phosphorous (P), aluminium (Al), iron (Fe) and manganese (Mn). 1 g of powdered sample material was placed in a digestion tube and was boiled for 90 minutes at 120 °C in aqua regia (2 ml bi-distilled water, 2 ml 70 % nitric acid (HNO<sub>3</sub>), 6 ml 37 % hydrochloric acid (HCl)) using a DigiPREP digestion system (DigiPREP MS SCP Science, Canada). All extracts including calibration standards were then filtered through a 41 grade Whatman filter and diluted with a dilution ratio of 1:2 for Ca, Mg, Na, K, P, and 1:1000 for Al, Fe, Mn using a diluting system (Hamilton 100, USA) before ICP-OES measurements. All extracts, including calibration standards, were then transferred into 50 ml PE-Tubes and digestion tubes rinsed three times bi-distilled water to remove potential residues before measurement of the extract.

**Total element composition based on XRF measurements [variables 16 to 64]:** Total elemental composition of unweathered rock samples of TropSOC's soil parent material was conducted using X-ray fluorescence (XRF) for Silica (Si), Titanium (Ti) and Zirkonium (Zr) following the procedure of Karathanasis & Hajek (1996). 4 g of powdered sample material and 1 g of CEROX wax were mixed for approximately 2 minutes using a vibrating mill (Mixer Mill MM 200 Retsch, Germany) before producing a pellet by applying pressure of 25 tons per cm<sup>2</sup> on the samples using a manual hydraulic press (Specac, USA). The stable and mixed pellet is then subsequently analysed using a XEPOS SEP03 XRF (Spectro Analytical Instruments GmbH).

## Acknowledgment

TropSOC was funded via the Emmy-Noether-Program of the German Research Foundation (project ID 387472333).

## References

- American Society for Testing Materials - ASTM. ASTM-D 5298-03. Standard test method for measurement of soil potential (suction) using filter paper. West Conshohocken, PA, 2003.
- Black, C. A. (ed.): Method of Soil Analysis, Part 2, Chemical and Microbiological Properties, American Society of Agronomy, Inc, Publisher, Madison, Wisconsin USA, 1965.

- Bouyoucos, G.J.: Hydrometer method improved for making particle Size analysis of soils. In: Agronomy Journal 53, 464-465, 1962
- Karathanasis, A. D. & B. F. Hajek: Elemental Analysis by X-Ray Fluorescence Spectroscopy - In: Soil Science Society of America Inc (1996): Methods of Soil Analysis. Part 3. Chemical Methods. SSA Book, USA, 1996.
- Okalebo J.R., Gathua K.W. & P.L. Woomer: Laboratory Methods of Soil and Plant Analysis: A Working Manual. Second Edition. TSBF-CIAT and SACRED Africa, Kenya. Nairobi, 2002.
- Pauwels, J. M, Eric Van Ranst, and Marc Verloo. Manuel De Laboratoire De Pédologie : Méthodes D'analyse De Sols Et De Plantes, équipement, Gestion De Stocks De Verrerie Et De Produits Chimiques. Yaoundé: Centre universitaire de Dschang. Département des sciences du sol, 1992.
