# Supplementary material for: Organic matter cycling along geochemical, geomorphic, and disturbance gradients in forest and cropland of the African Tropics – project TropSOC database version 1.0
Source: Copernicus journal article supplement (doi:10.5194/essd-13-4133-2021), 2021-08-25
Supplement: Supplementary file 7 [file essd-13-4133-2021-supplement.zip]

## TropSOC Database

### 2.1.9. Forest – Vegetation – Root biomass aggregated to seasonal values

When using these data, please cite the database and the key publication in ESSD:

Doetterl, S.; Bukombe, B.; Cooper, M.; Kidinda, L.; Muhindo, D.; Reichenbach, M.; Stegmann, A.; Summerauer, L.; Wilken, F.; Fiener, P. (2021): TropSOC Database. V. 1.0. GFZ Data Services.

<https://doi.org/10.5880/fidgeo.2021.009>

Licence: Creative Commons Attribution 4.0 International ([CC BY 4.0](https://creativecommons.org/licenses/by/4.0/))

Doetterl S., Asifiwe R.K., Baert G., Bamba F., Bauters M., Boeckx P., Bukombe B., Cadisch G., Cizungu L.N., Cooper M., Hoyt A., Kabaseke C., Kalbitz K., Kidinda L., Maier A., Mainka M., Mayrock J., Muhindo D., Mujinya B.B., Mukotanyi, S.M., Nabahungu L., Reichenbach M., Rewald B., Six J., Stegmann A., Summerauer L., Unseld R., Vanlauwe B., Van Oost K., Verheyen K. Vogel C., Wilken F., Fiener P. Organic matter cycling along geochemical, geomorphic and disturbance gradients in forests and cropland of the African Tropics - Project TropSOC Database Version 1.0. *Earth System Science Data*. <https://doi.org/10.5194/essd-2021-73>, 2021.

#### Introduction

The data set comprises a unique plot identifier, information on the season which the collected data represents, followed by 18 variables that provide data regarding the root biomass aggregated for each season at the plot level for TropSOC's forest plots.

#### Data structure

| No. | Variable     | Explanation                                                                                                                                                        | Unit                |
|-----|--------------|--------------------------------------------------------------------------------------------------------------------------------------------------------------------|---------------------|
| 1   | plotID       | unique identifier of each plot and point where data were collected                                                                                                 | -                   |
| 2   | season       | season represented by the data. main seasons divided by precipitation; weak_dry: Dec – Feb; strong_rain: March – May; strong_dry: June – Aug; weak_rain: Sep – Nov | -                   |
| 3   | layer        | soil layer from which samples were collected with 0 = "O horizon"; 1 = 0–10 cm; 2 = 10 – 20 cm; 3 = 20 – 30 cm; 4 = 30 - 50 cm                                     | -                   |
| 4   | o_hor        | depths of O horizon                                                                                                                                                | cm                  |
| 5   | min_fr_liv   | minimum living fine roots (< 2 mm)                                                                                                                                 | mg cm <sup>-3</sup> |
| 6   | max_fr_liv   | maximum living fine roots (< 2 mm)                                                                                                                                 | mg cm <sup>-3</sup> |
| 7   | mean_fr_liv  | mean living fine roots (< 2 mm)                                                                                                                                    | mg cm <sup>-3</sup> |
| 8   | sd_fr_liv    | standard deviation of mean living fine roots (< 2 mm)                                                                                                              | mg cm <sup>-3</sup> |
| 9   | min_fr_dead  | minimum dead fine roots (< 2 mm)                                                                                                                                   | mg cm <sup>-3</sup> |
| 10  | max_fr_dead  | maximum dead fine roots (< 2 mm)                                                                                                                                   | mg cm <sup>-3</sup> |
| 11  | mean_fr_dead | mean dead fine roots (< 2 mm)                                                                                                                                      | mg cm <sup>-3</sup> |
| 12  | sd_fr_dead   | standard deviation of mean dead fine roots (< 2 mm)                                                                                                                | mg cm <sup>-3</sup> |
| 13  | min_cr_liv   | minimum living coarse roots (> 2 mm)                                                                                                                               | mg cm <sup>-3</sup> |
| 14  | max_cr_liv   | maximum living coarse roots (> 2 mm)                                                                                                                               | mg cm <sup>-3</sup> |
| 15  | mean_cr_liv  | mean living coarse roots (> 2 mm)                                                                                                                                  | mg cm <sup>-3</sup> |
| 16  | sd_cr_liv    | standard deviation of mean living coarse roots (> 2 mm)                                                                                                            | mg cm <sup>-3</sup> |
| 17  | min_cr_dead  | minimum dead coarse roots (> 2 mm)                                                                                                                                 | mg cm <sup>-3</sup> |
| 18  | max_cr_dead  | maximum dead coarse roots (> 2 mm)                                                                                                                                 | mg cm <sup>-3</sup> |
| 19  | mean_cr_dead | mean dead coarse roots (> 2 mm)                                                                                                                                    | mg cm <sup>-3</sup> |

|    |            |                                                             |                     |
|----|------------|-------------------------------------------------------------|---------------------|
| 20 | sd_cr_dead | standard deviation of mean dead coarse roots (> 2 mm)       | mg cm <sup>-3</sup> |
| 21 | no         | total number of observations considered in the calculations | -                   |

**Methods**

This dataset comprises a seasonal aggregation of root biomass data (*218\_root\_biomass.csv*) described in detail in *218\_root\_biomass.pdf*. The data were aggregated at the plot level in four seasons, which were categorized based on the average precipitation for each period: weak dry season (December-February), strong rain season (March-May), strong dry season (June-August) and weak rain season (September-November).

**Acknowledgment**

TropSOC was funded via the Emmy-Noether-Program of the German Research Foundation (project ID 387472333).
