# Supplementary material for: Organic matter cycling along geochemical, geomorphic, and disturbance gradients in forest and cropland of the African Tropics – project TropSOC database version 1.0
Source: Copernicus journal article supplement (doi:10.5194/essd-13-4133-2021), 2021-08-25
Supplement: Supplementary file 8 [file essd-13-4133-2021-supplement.zip]

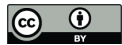

## *Supplement of*

# **Organic matter cycling along geochemical, geomorphic, and disturbance gradients in forest and cropland of the African Tropics – project TropSOC database version 1.0**

**Sebastian Doetterl et al.**

*Correspondence to:* Sebastian Doetterl ([sdoetterl@usys.ethz.ch](mailto:sdoetterl@usys.ethz.ch))

- `essd-13-4133-2021-supplement-title-page.pdf`
- `TropSOC_DATABASE_v1.0_final`
  - `0_intro_structure.pdf`
  - `1_basic_information`
    - \* `11_plots_points.csv`
    - \* `11_plots_points.pdf`
    - \* `12_sample_identifier.csv`
    - \* `12_sample_identifier.pdf`
    - \* `1_basic_information.pdf`
  - `2_forest`
    - \* `2110_root_biomass_annual.csv`
    - \* `2110_root_biomass_annual.pdf`
    - \* `2111_root_prod.csv`
    - \* `2111_root_prod.pdf`
    - \* `2112_root_prod_seasonal.csv`
    - \* `2112_root_prod_seasonal.pdf`
    - \* `2113_root_prod_annual.csv`
    - \* `2113_root_prod_annual.pdf`
    - \* `211_forest_invent.csv`
    - \* `211_forest_invent.pdf`
    - \* `212_forest_invent_agg.csv`
    - \* `212_forest_invent_agg.pdf`
    - \* `213_fresh_leaves.csv`
    - \* `213_fresh_leaves.pdf`
    - \* `214_fresh_leaves_agg.csv`
    - \* `214_fresh_leaves_agg.pdf`

- \* 215\_litter.csv
- \* 215\_litter.pdf
- \* 216\_litter\_seasonal.csv
- \* 216\_litter\_seasonal.pdf
- \* 217\_litter\_annual.csv
- \* 217\_litter\_annual.pdf
- \* 218\_root\_biomass.csv
- \* 218\_root\_biomass.pdf
- \* 219\_root\_biomass\_seasonal.csv
- \* 219\_root\_biomass\_seasonal.pdf
- \* 221\_soil\_carbon.csv
- \* 221\_soil\_carbon.pdf
- \* 222\_soil\_phy\_chem.csv
- \* 222\_soil\_phy\_chem.pdf
- \* 223\_soil\_spec.csv
- \* 223\_soil\_spec.pdf
- \* 231\_soil\_organic\_layer.csv
- \* 231\_soil\_organic\_layer.pdf
- \* 241\_pu\_inventory.csv
- \* 241\_pu\_inventory.pdf
- \* 251\_incubation.csv
- \* 251\_incubation.pdf
- \* 252\_microbiology.csv
- \* 252\_microbiology.pdf
- \* 253\_c14.csv
- \* 253\_c14.pdf
- \* 261\_rocks.csv
- \* 261\_rocks.pdf
- \* 271\_profiles.csv
- \* 271\_profiles.pdf
- \* 2\_forest.pdf
- 3\_cropland
  - \* 311\_biomass.csv
  - \* 311\_biomass.pdf
  - \* 312\_management.csv
  - \* 312\_management.pdf
  - \* 321\_soil\_carbon.csv
  - \* 321\_soil\_carbon.pdf
  - \* 322\_soil\_phy\_chem.csv
  - \* 322\_soil\_phy\_chem.pdf
  - \* 323\_soil\_spec.csv
  - \* 323\_soil\_spec.pdf
  - \* 331\_pu\_inventory.csv
  - \* 331\_pu\_inventory.pdf
  - \* 341\_incubation.csv
  - \* 341\_incubation.pdf
  - \* 342\_c14.csv

- \* 342\_c14.pdf
- \* 3\_cropland.pdf
- 4\_meteo
  - \* 410\_meteo\_locations.csv
  - \* 410\_meteo\_locations.pdf
  - \* 420\_meteo\_daily.csv
  - \* 420\_meteo\_daily.pdf
  - \* 430\_meteo\_pcp\_trig.csv
  - \* 430\_meteo\_pcp\_trig.pdf
  - \* 4\_meteo.pdf

The copyright of individual parts of the supplement might differ from the article licence.
