# Supplementary material for: Organic matter cycling along geochemical, geomorphic, and disturbance gradients in forest and cropland of the African Tropics – project TropSOC database version 1.0
Source: Copernicus journal article supplement (doi:10.5194/essd-13-4133-2021), 2021-08-25
Supplement: Supplementary file 9 [file essd-13-4133-2021-supplement.zip]

## TropSOC Database

### 4.1. Meteorological data – Locations of meteorological stations

When using these data, please cite the database and the key publication in ESSD:

Doetterl, S.; Bukombe, B.; Cooper, M.; Kidinda, L.; Muhindo, D.; Reichenbach, M.; Stegmann, A.; Summerauer, L.; Wilken, F.; Fiener, P. (2021): TropSOC Database. V. 1.0. GFZ Data Services.

<https://doi.org/10.5880/fidgeo.2021.009>

Licence: Creative Commons Attribution 4.0 International ([CC BY 4.0](https://creativecommons.org/licenses/by/4.0/))

Doetterl S., Asifiwe R.K., Baert G., Bamba F., Bauters M., Boeckx P., Bukombe B., Cadisch G., Cizungu L.N., Cooper M., Hoyt A., Kabaseke C., Kalbitz K., Kidinda L., Maier A., Mainka M., Mayrock J., Muhindo D., Mujinya B.B., Mukotanyi, S.M., Nabahungu L., Reichenbach M., Rewald B., Six J., Stegmann A., Summerauer L., Unseld R., Vanlauwe B., Van Oost K., Verheyen K. Vogel C., Wilken F., Fiener P. Organic matter cycling along geochemical, geomorphic and disturbance gradients in forests and cropland of the African Tropics - Project TropSOC Database Version 1.0. *Earth System Science Data*. <https://doi.org/10.5194/essd-2021-73>, 2021.

#### Introduction

The dataset comprises a unique identifier for each meteorological station followed by 6 variables that provide information regarding names, locations, elevation, instruments and number of parameters measured at each station.

#### Data structure

| No. | Variable     | Explanation                                      | Unit |
|-----|--------------|--------------------------------------------------|------|
| 1   | stationID    | identification number of meteorological stations | -    |
| 2   | station_name | station name as used in TropSOC project          | -    |
| 3   | lat_deg      | latitude in decimal degree                       | °    |
| 4   | long_deg     | longitude in decimal degree                      | °    |
| 5   | elev_m       | elevation above sea level                        | m    |
| 6   | device_type  | brand and name of the measuring device           | -    |
| 7   | no_param     | number of parameters recorded by device          | -    |

#### Acknowledgment

TropSOC was funded via the Emmy-Noether-Program of the German Research Foundation (project ID 387472333). Micrometeorological data from three of our weather stations (Bukavu, Lukananda, Bugulumiza) were made available and are administered by the Trans-African Hydro-Meteorological Observatory (TAHMO). New and additional data can be acquired at <https://tahmo.org>.
