# Supplementary material for: Organic matter cycling along geochemical, geomorphic, and disturbance gradients in forest and cropland of the African Tropics – project TropSOC database version 1.0
Source: Copernicus journal article supplement (doi:10.5194/essd-13-4133-2021), 2021-08-25
Supplement: Supplementary file 10 [file essd-13-4133-2021-supplement.zip]

## TropSOC Database

### 2.1.6. Forest – Vegetation – Litter fall aggregated to seasonal values

When using these data, please cite the database and the key publication in ESSD:

Doetterl, S.; Bukombe, B.; Cooper, M.; Kidinda, L.; Muhindo, D.; Reichenbach, M.; Stegmann, A.; Summerauer, L.; Wilken, F.; Fiener, P. (2021): TropSOC Database. V. 1.0. GFZ Data Services.

<https://doi.org/10.5880/fidgeo.2021.009>

Licence: Creative Commons Attribution 4.0 International ([CC BY 4.0](https://creativecommons.org/licenses/by/4.0/))

Doetterl S., Asifiwe R.K., Baert G., Bamba F., Bauters M., Boeckx P., Bukombe B., Cadisch G., Cizungu L.N., Cooper M., Hoyt A., Kabaseke C., Kalbitz K., Kidinda L., Maier A., Mainka M., Mayrock J., Muhindo D., Mujinya B.B., Mukotanyi, S.M., Nabahungu L., Reichenbach M., Rewald B., Six J., Stegmann A., Summerauer L., Unseld R., Vanlauwe B., Van Oost K., Verheyen K. Vogel C., Wilken F., Fiener P. Organic matter cycling along geochemical, geomorphic and disturbance gradients in forests and cropland of the African Tropics - Project TropSOC Database Version 1.0. *Earth System Science Data*. <https://doi.org/10.5194/essd-2021-73>, 2021.

#### Introduction

The dataset comprises a unique plot identifier, information regarding the season for which data is collected for, followed by six variables that describe litterfall monitoring data aggregated for each season at the plot level. Missing values are indicated by -9999.

#### Data structure

| No. | Variable    | Explanation                                                                                                                         | Unit                                     |
|-----|-------------|-------------------------------------------------------------------------------------------------------------------------------------|------------------------------------------|
| 1   | plotID      | unique identifier of each plot and point where data were collected                                                                  | -                                        |
| 2   | season      | main seasons divided by precipitation; weak_dry: Dec – Feb; strong_rain: March – May; strong_dry: June – Aug; weak_rain: Sep – Nov) | -                                        |
| 3   | min_litter  | minimum daily litterfall production per season                                                                                      | Mg ha <sup>-1</sup> day <sup>-1</sup>    |
| 4   | max_litter  | maximum daily litterfall production per season                                                                                      | Mg ha <sup>-1</sup> day <sup>-1</sup>    |
| 5   | mean_litter | mean daily litterfall production per season                                                                                         | Mg ha <sup>-1</sup> day <sup>-1</sup>    |
| 6   | sd_litter   | standard deviation of mean daily litterfall production per season                                                                   | Mg ha <sup>-1</sup> day <sup>-1</sup>    |
| 7   | sum_litter  | sum of litterfall production per season                                                                                             | Mg ha <sup>-1</sup> season <sup>-1</sup> |
| 8   | no          | total number of observations per season considered in calculations                                                                  | -                                        |

#### Methods

This dataset comprises a seasonal aggregation of the litter data (*215\_litter.csv*) described in detail in *215\_litter.pdf*. The data were aggregated in four seasons, which were categorized based on the average precipitation for each period: weak dry season (December-February), strong rain season (March-May), strong dry season (June-August) and weak rain season (September-November).

#### Acknowledgment

TropSOC was funded via the Emmy-Noether-Program of the German Research Foundation (project ID 387472333).
