# Supplementary material for: Organic matter cycling along geochemical, geomorphic, and disturbance gradients in forest and cropland of the African Tropics – project TropSOC database version 1.0
Source: Copernicus journal article supplement (doi:10.5194/essd-13-4133-2021), 2021-08-25
Supplement: Supplementary file 21 [file essd-13-4133-2021-supplement.zip]

## TropSOC Database

### 4. Meteorological data

When using these data, please cite the database and the key publication in ESSD:

Doetterl, S.; Bukombe, B.; Cooper, M.; Kidinda, L.; Muhindo, D.; Reichenbach, M.; Stegmann, A.; Summerauer, L.; Wilken, F.; Fiener, P. (2021): TropSOC Database. V. 1.0. GFZ Data Services.

<https://doi.org/10.5880/fidgeo.2021.009>

Licence: Creative Commons Attribution 4.0 International ([CC BY 4.0](https://creativecommons.org/licenses/by/4.0/))

Doetterl S., Asifiwe R.K., Baert G., Bamba F., Bauters M., Boeckx P., Bukombe B., Cadisch G., Cizungu L.N., Cooper M., Hoyt A., Kabaseke C., Kalbitz K., Kidinda L., Maier A., Mainka M., Mayrock J., Muhindo D., Mujinya B.B., Mukotanyi, S.M., Nabahungu L., Reichenbach M., Rewald B., Six J., Stegmann A., Summerauer L., Unseld R., Vanlauwe B., Van Oost K., Verheyen K. Vogel C., Wilken F., Fiener P. Organic matter cycling along geochemical, geomorphic and disturbance gradients in forests and cropland of the African Tropics - Project TropSOC Database Version 1.0. *Earth System Science Data*. <https://doi.org/10.5194/essd-2021-73>, 2021.

#### **Description**

The meteorological data comprises 4 parts:

**Part 1:** Locations of meteorological stations: Coordinates, elevations and contact addresses for the respective data can be found in file *410\_meteo\_locations.csv* with the description given in *410\_meteo\_locations.pdf*.

**Part 2:** Daily meteorological data: six meteorological stations recording precipitation, air temperature, relative humidity, air pressure, solar radiation, wind speed. Data can be found in the files *420\_meteo\_daily.csv* with the description given in *420\_meteo\_daily.pdf*.

**Part 3:** High resolution five-minute triggered precipitation data: Precipitation recorded at the time of tipping bucket tilt at a resolution of five-minutes resolution. Data can be found in the file *430\_pcp\_trig.csv* with the description given in *430\_pcp\_trig.pdf*.

#### **Acknowledgment**

TropSOC was funded via the Emmy-Noether-Program of the German Research Foundation (project ID 387472333).
