# Supplementary material for: Organic matter cycling along geochemical, geomorphic, and disturbance gradients in forest and cropland of the African Tropics – project TropSOC database version 1.0
Source: Copernicus journal article supplement (doi:10.5194/essd-13-4133-2021), 2021-08-25
Supplement: Supplementary file 25 [file essd-13-4133-2021-supplement.zip]

## TropSOC Database

### 2.2.3. Forest – Mineral Soil Layers – Physicochemical soil properties from NIR-MIR spectroscopy

When using these data, please cite the database and the key publication in ESSD:

Doetterl, S.; Bukombe, B.; Cooper, M.; Kidinda, L.; Muhindo, D.; Reichenbach, M.; Stegmann, A.; Summerauer, L.; Wilken, F.; Fiener, P. (2021): TropSOC Database. V. 1.0. GFZ Data Services.

<https://doi.org/10.5880/fidgeo.2021.009>

Licence: Creative Commons Attribution 4.0 International ([CC BY 4.0](https://creativecommons.org/licenses/by/4.0/))

Doetterl S., Asifiwe R.K., Baert G., Bamba F., Bauters M., Boeckx P., Bukombe B., Cadisch G., Cizungu L.N., Cooper M., Hoyt A., Kabaseke C., Kalbitz K., Kidinda L., Maier A., Mainka M., Mayrock J., Muhindo D., Mujinya B.B., Mukotanyi, S.M., Nabahungu L., Reichenbach M., Rewald B., Six J., Stegmann A., Summerauer L., Unseld R., Vanlauwe B., Van Oost K., Verheyen K. Vogel C., Wilken F., Fiener P. Organic matter cycling along geochemical, geomorphic and disturbance gradients in forests and cropland of the African Tropics - Project TropSOC Database Version 1.0. *Earth System Science Data*. <https://doi.org/10.5194/essd-2021-73>, 2021.

#### Introduction

The dataset comprises a unique plot and sample identifier and 60 additional soil variables derived from physical and chemical laboratory analyses for TropSOC's forest plots. The dataset represents the predictions of depth explicit physicochemical soil properties using near and mid-infrared spectroscopy at the plot level for TropSOC's forest plots. Predictions are given for 10 soil depth increments of 10 cm each for the top 1 meter of soil, calibrated on data from 4 depth intervals (0 - 10 cm, 30 - 40 cm, and 60 - 70 cm, 90 - 100 cm). Missing values are indicated by -9999. Note that some variables report negative values. In most cases, these values are the result of samples with very low concentrations of the measured parameter or samples outside the calibrated range of our measurements. We recommend to consider those data points as "no data" or "below detection limit". Information on wet chemistry calibration data and its methodology can be found in [221\\_soil\\_carbon.csv/pdf](#) and [222\\_soil\\_phy\\_chem.csv/pdf](#). Details regarding plots and plot design can be found in [2\\_forest.pdf](#).

#### Data structure

| No. | Variables   | Explanation                                                           | Unit               | Variable names in non-spectrometric analysis <sup>1</sup> |
|-----|-------------|-----------------------------------------------------------------------|--------------------|-----------------------------------------------------------|
| 1   | plotID      | unique identifier of each plot and point where data were collected    | -                  | plotID                                                    |
| 2   | sampleID    | unique identifier of any soil or vegetation sample taken in the field | -                  | sampleID                                                  |
| 3   | BD_spec     | bulk density of mineral soil layer                                    | g cm <sup>-3</sup> | BD_m_soil                                                 |
| 4   | clay_spec   | clay [<2 µm] fraction of fine soil [<2 mm]                            | wt %               | clay                                                      |
| 5   | silt_spec   | silt [2-53 µm] fraction of fine soil [<2 mm]                          | wt %               | silt                                                      |
| 6   | sand_spec   | sand [2000-53 µm] fraction of fine soil [<2 mm]                       | wt %               | sand                                                      |
| 7   | pH_KCL_spec | pH measured in 1 M KCl solution                                       | -                  | pH_KCl                                                    |

|    |                      |                                                                                                     |                                                           |                     |
|----|----------------------|-----------------------------------------------------------------------------------------------------|-----------------------------------------------------------|---------------------|
| 8  | TC_spec              | carbon content of the bulk soil                                                                     | wt %                                                      | mean_C_bulk         |
| 9  | TN_spec              | nitrogen content of the bulk soil                                                                   | wt %                                                      | mean_N_bulk         |
| 10 | CN_spec              | C/N ratio                                                                                           | -                                                         | -                   |
| 11 | P_avail_spec         | soil plant available phosphorus (Bray-P)                                                            | mg kg <sup>-1</sup>                                       | P_avail             |
| 12 | bases_in_CEC_spec    | base saturation of potential cation exchange capacity                                               | %                                                         | bases_in_CEC        |
| 13 | CEC_spec             | potential cation exchange capacity                                                                  | meq 100 g <sup>-1</sup><br>[= cmol(+) kg <sup>-1</sup> ]  | CEC                 |
| 14 | bases_in_ECEC_spec   | base saturation of effective cation exchange capacity                                               | %                                                         | bases_in_ECEC       |
| 15 | ECEC_spec            | effective cation exchange capacity                                                                  | meq 100 g <sup>-1</sup><br>[= cmol(+) kg <sup>-1</sup> ]] | ECEC                |
| 16 | exch_bases_Mg_spec   | exchangeable Mg <sup>2+</sup> of ECEC                                                               | meq 100 g <sup>-1</sup><br>[= cmol(+) kg <sup>-1</sup> ]  | exch_bases_Mg       |
| 17 | exch_bases_Ca_spec   | exchangeable Ca <sup>2+</sup> of ECEC                                                               | meq 100 g <sup>-1</sup><br>[= cmol(+) kg <sup>-1</sup> ]  | exch_bases_Ca       |
| 18 | exch_bases_K_spec    | exchangeable K <sup>+</sup> of ECEC                                                                 | meq 100 g <sup>-1</sup><br>[= cmol(+) kg <sup>-1</sup> ]  | exch_bases_K        |
| 19 | exch_acidity_Al_spec | exchangeable Al <sup>3+</sup> of ECEC                                                               | meq 100 g <sup>-1</sup><br>[= cmol(+) kg <sup>-1</sup> ]  | exch_acidity_Al     |
| 20 | Al_py_extract_spec   | mass percent of sodium-pyrophosphate extractable Al in mass percent of the bulk soil                | %                                                         | mean_Al_py_extract  |
| 21 | Al_ox_extract_spec   | mass percent of ammonium oxalate-oxalic acid extractable Al in mass percent of the bulk soil        | %                                                         | mean_Al_ox_extract  |
| 22 | Al_dcb_extract_spec  | mean mass percent of dithionite-citrate-bicarbonate extractable Al in mass percent of the bulk soil | %                                                         | mean_Al_dcb_extract |
| 23 | Fe_py_extract_spec   | mass percent of sodium-pyrophosphate extractable Fe in mass percent of the bulk soil                | %                                                         | mean_Fe_py_extract  |
| 24 | Fe_ox_extract_spec   | mass percent of ammonium oxalate-oxalic acid extractable Fe in mass percent of the bulk soil        | %                                                         | mean_Fe_ox_extract  |
| 25 | Fe_dcb_extract_spec  | mass percent of dithionite-citrate-bicarbonate extractable Fe in mass percent of the bulk soil      | %                                                         | mean_Fe_dcb_extract |
| 26 | Mn_py_extract_spec   | mass percent of sodium-pyrophosphate extractable Mn in mass percent of the bulk soil                | %                                                         | mean_Mn_py_extract  |
| 27 | Mn_ox_extract_spec   | mass percent of ammonium oxalate-oxalic acid extractable Mn in mass percent of the bulk soil        | %                                                         | mean_Mn_ox_extract  |
| 28 | Mn_dcb_extract_spec  | mass percent of dithionite-citrate-bicarbonate extractable Mn in mass percent of the bulk soil      | %                                                         | mean_Mn_dcb_extract |
| 29 | Ca_ICPOES_spec       | Ca concentration in bulk soil                                                                       | mg kg <sup>-1</sup>                                       | mean_Ca_bulk_ICPOES |
| 30 | K_ICPOES_spec        | K concentration in bulk soil                                                                        | mg kg <sup>-1</sup>                                       | mean_K_bulk_ICPOES  |

|    |                          |                                                                                            |                     |                                                                                     |
|----|--------------------------|--------------------------------------------------------------------------------------------|---------------------|-------------------------------------------------------------------------------------|
| 31 | Mg_ICPOES_spec           | Mg concentration in bulk soil                                                              | mg kg <sup>-1</sup> | mean_Mg_bulk_ICPOES                                                                 |
| 32 | Na_ICPOES_spec           | Na concentration in bulk soil                                                              | mg kg <sup>-1</sup> | mean_Na_bulk_ICPOES                                                                 |
| 33 | P_ICPOES_spec            | P concentration in bulk soil                                                               | mg kg <sup>-1</sup> | mean_P_bulk_ICPOES                                                                  |
| 34 | Ti_ICPOES_spec           | Ti concentration in bulk soil                                                              | mg kg <sup>-1</sup> | mean_Ti_bulk_ICPOES                                                                 |
| 35 | Al_ICPOES_spec           | Al concentration in bulk soil                                                              | g kg <sup>-1</sup>  | mean_Al_bulk_ICPOES                                                                 |
| 36 | Fe_ICPOES_spec           | Fe concentration in bulk soil                                                              | g kg <sup>-1</sup>  | mean_Fe_bulk_ICPOES                                                                 |
| 37 | Mn_ICPOES_spec           | Mn concentration in bulk soil                                                              | mg kg <sup>-1</sup> | mean_Mn_bulk_ICPOES                                                                 |
| 38 | Si_XRF_spec              | Si concentration in bulk soil                                                              | %                   | Si_XRF                                                                              |
| 39 | S_XRF_spec               | S concentration in bulk soil                                                               | µg g <sup>-1</sup>  | S_XRF                                                                               |
| 40 | Zr_XRF_spec              | Zr concentration in bulk soil                                                              | µg g <sup>-1</sup>  | Zr_XRF                                                                              |
| 41 | Ti_XRF_spec              | Ti concentration in bulk soil                                                              | %                   | Ti_XRF                                                                              |
| 42 | TI_ZR_ratio_spec         | ratio between Ti and Zr in bulk soil                                                       | -                   | -                                                                                   |
| 43 | clay_SI_ratio_spec       | ratio between clay and Si                                                                  | -                   | -                                                                                   |
| 44 | Fe_tot_Fe_dcb_ratio_spec | ration between Fe total and Fe dcb                                                         | -                   | -                                                                                   |
| 45 | delta_14C_CO2_spec       | delta <sup>14</sup> C of CO <sub>2</sub>                                                   | ‰                   | delta_14C_CO2                                                                       |
| 46 | delta_14C_soil_spec      | delta <sup>14</sup> C of the bulk soil                                                     | ‰                   | delta_14C_soil                                                                      |
| 47 | FMC_CO2_spec             | fraction modern carbon of CO <sub>2</sub>                                                  | %                   | FMC_CO2                                                                             |
| 48 | FMC_soil_spec            | fraction modern carbon of the bulk soil                                                    | %                   | FMC_soil                                                                            |
| 49 | Cmass_CPOM_spec          | fraction of organic carbon mass associated with coarse particulate organic matter          | -                   | no equivalent (can be calculated from mean_C_bulk multiplied with mean_weight_CPOM) |
| 50 | Cmass_m_spec             | fraction of organic carbon mass associated with microaggregate                             | -                   | no equivalent (can be calculated from mean_C_bulk multiplied with mean_weight_m)    |
| 51 | Cmass_s+c_spec           | fraction of organic carbon mass associated with free silt and clay                         | -                   | no equivalent (can be calculated from mean_C_s+c multiplied with mean_weight_s+c)   |
| 52 | Cconc_bulk_spec          | organic carbon concentration of the bulk soil                                              | %TC                 | mean_C_bulk                                                                         |
| 53 | Cconc_CPOM_spec          | organic carbon concentration of coarse particulate organic matter fraction                 | %TC                 | mean_C_CPOM                                                                         |
| 54 | Cconc_m_spec             | organic carbon concentration of microaggregates fraction                                   | %TC                 | mean_C_m                                                                            |
| 55 | Cconc_s+c_spec           | organic carbon concentration of free silt and clay fraction                                | %TC                 | mean_C_s+c                                                                          |
| 56 | Nmass_CPOM_spec          | fraction of total nitrogen mass associated with coarse particulate organic matter fraction | -                   | no equivalent (can be calculated from mean_N_bulk multiplied with mean_weight_CPOM) |
| 57 | Nmass_m_spec             | fraction of total nitrogen mass associated with microaggregate                             | -                   | no equivalent (can be calculated from mean_N_bulk multiplied with mean_weight_m)    |
| 58 | Nmass_s+c_spec           | fraction of total nitrogen mass associated with free silt and clay                         | -                   | no equivalent (can be calculated from mean_N_s+c)                                   |

|    |                 |                                                                            |     | multiplied with<br>mean_weight_s+c) |
|----|-----------------|----------------------------------------------------------------------------|-----|-------------------------------------|
| 59 | Nconc_bulk_spec | total nitrogen concentration of the bulk soil                              | %TN | mean_N_bulk                         |
| 60 | Nconc_CPOM_spec | total nitrogen concentration of coarse particulate organic matter fraction | %TN | mean_N_CPOM                         |
| 61 | Nconc_m_spec    | total nitrogen concentration of microaggregates fraction                   | %TN | mean_N_m                            |
| 62 | Nconc_s+c_spec  | total nitrogen concentration of free silt and clay fraction                | %TN | mean_N_s+c                          |

<sup>1)</sup> see 221\_soil\_carbon.csv/pdf; 222\_soil\_phy\_chem.pdf/csv; 253\_c14.csv/pdf

## Methods

### Preparation

All samples (n=1458) were finely ground using a ball mill and measured with a VERTEX70 Fourier Transform-Infrared (FT-IR) spectrometer with a High Throughput Screening Extension (HTS-XT) (Bruker Optics GmbH, Germany). Two replicates per sample were filled into the cups of a 24-well plate and the surface was flattened without compression using a spatula. IR reflectance was acquired for a wave-number range of 7500 cm<sup>-1</sup> and 600 cm<sup>-1</sup> (wavelengths of 1333.3 nm to 16666.7 nm) with an effective resolution of 2 cm<sup>-1</sup>. Gold was used as a background material on every well to normalize the reflectance spectra of all subsequent soil samples of the same well. For each sample, 32 co-added internal measurements were averaged and corrected for atmospheric CO<sub>2</sub> and H<sub>2</sub>O using the OPUS spectrometer software (Bruker Optics GmbH, Ettingen, Germany). Reflectance was transformed into absorbance using log(1/reflectance) prior to further processing and subsequent modelling.

### Analyses

All spectra were processed using the R packages 'simplerspec' (Baumann, 2020), 'prospectr' (Stevens and Ramirez-Lopez, 2020) and 'caret' (Kuhn, 2020) in the R statistical computing environment (R Core Team, 2020). The two replicates of spectral measurements per soil sample were averaged. The spectra were then resampled to a resolution of 16 cm<sup>-1</sup> and trimmed to the 4000–600 cm<sup>-1</sup> spectral range. Smaller resolutions (4cm<sup>-1</sup>, 2 cm<sup>-1</sup>) were compared as well, but did not result in more accurate calibration models. Spectral pre-processing was optimized using the suggested workflow of Summerauer et al. (2021), minimizing the reconstruction error when back-transforming the PLS projection of the pre-processed spectra of the prediction set into a spectral matrix, using the projection model built with the pre-processed spectra of the reference set. A Savitzki-Golay filter combined with a second derivate, second order polynomial approximation with a window size of 15 cm<sup>-1</sup> with a subsequent multiplicative scatter correction resulted in the smallest reconstruction error and was therefore selected as pre-processing for further analyses.

For each response variable, the available reference data was merged with the corresponding spectral data. The data were then split up into calibration sets (2/3 of each reference set) and into a validation set (1/3 of each reference set) using k-means sampling, keeping the number of principal components which explain 99 % of the total variance. K-means sampling selects one sample per cluster defined in a cluster analyses on a PCA of pre-processed spectra (Naes et al. 2002). Set sizes varied, since different reference samples were chemically analysed for different soil properties.

For every soil property, Partial Least Squares (PLS) regressions were trained with the calibration sets. To determine the optimal number of components for the regression models, a five times repeated 10-

fold cross-validation was applied. The best number of components was chosen as the one within one standard error of the optimal model with the lowest average Root Mean Square Error (RMSE) for all evaluated components. The optimal number of components was then used to train the final model with the complete calibration set. The maximal number of components was set to 15, the final selected number of components varied between 1 and 14, depending on the response variable. Model validation was independently tested with the held-out validation set. Goodness of fit ranged with an  $R^2$  for the calibration (Table 1) between 0.08 and 0.99 and for the validation (Table 2) between 0.08 and 0.96. The RPIQ (ratio of performance to interquartile distance) ranged for the calibration between 0.28 and 14.00 and for the model validation between 0.34 and 7.68. RPD (Ratio of standard error of performance to standard deviation) ranged from 1.0 to 11.1 for the calibration and from 1.0 to 4.6 for the validation. **Note that no parameters were included, where  $R^2 < 0.3$  for validation and calibration data, which generally resembles also low RPD values  $< 1.2$ .**

**Table 1.** Statistical performance evaluation for the calibration dataset for all measured parameters (n= 52 - 963) described above for TropSOC's soil data and following the workflow suggested by Sommerauer et al. (2021). Abbreviations: n= number of observations used; CV = Coefficient of variation;  $R^2$  = explained variation; RMSE = root mean squared error; RPD = Ratio of standard error of performance to standard deviation; RPIQ= ratio of performance to interquartile distance (RPIQ).

| Variable no. | Variable             | Unit                                                                      | n   | CV     | RMSE   | $R^2$ | RPD   | RPIQ  |
|--------------|----------------------|---------------------------------------------------------------------------|-----|--------|--------|-------|-------|-------|
| 3            | BD_spec              | $\text{g cm}^{-3}$                                                        | 963 | 25.64  | 0.27   | 0.42  | 1.32  | 1.62  |
| 4            | clay_spec            | wt %                                                                      | 156 | 37.41  | 4.43   | 0.93  | 3.78  | 5.45  |
| 5            | silt_spec            | wt %                                                                      | 156 | 52.75  | 4.02   | 0.80  | 2.24  | 1.99  |
| 6            | sand_spec            | wt %                                                                      | 156 | 43.32  | 5.28   | 0.90  | 3.13  | 4.58  |
| 7            | pH_KCL_spec          | -                                                                         | 156 | 17.87  | 0.27   | 0.87  | 2.76  | 3.51  |
| 8            | TC_spec              | wt %                                                                      | 202 | 78.75  | 0.53   | 0.92  | 3.49  | 4.04  |
| 9            | TN_spec              | wt %                                                                      | 202 | 80.24  | 0.05   | 0.89  | 3.08  | 3.33  |
| 10           | CN_spec              | -                                                                         | 202 | 190.20 | 11.73  | 0.84  | 2.50  | 0.29  |
| 11           | P_avail_spec         | $\text{mg kg}^{-1}$                                                       | 156 | 170.09 | 29.96  | 0.81  | 2.28  | 1.09  |
| 12           | bases_in_CEC_spec    | %                                                                         | 156 | 102.25 | 10.61  | 0.86  | 2.71  | 3.77  |
| 13           | CEC_spec             | $\text{meq } 100 \text{ g}^{-1}$<br>[= $\text{cmol}(+) \text{ kg}^{-1}$ ] | 156 | 51.65  | 4.62   | 0.83  | 2.46  | 3.74  |
| 14           | bases_in_ECEC_spec   | %                                                                         | 156 | 68.11  | 13.45  | 0.86  | 2.67  | 5.69  |
| 15           | ECEC_spec            | $\text{meq } 100 \text{ g}^{-1}$<br>[= $\text{cmol}(+) \text{ kg}^{-1}$ ] | 156 | 63.03  | 1.92   | 0.89  | 3.01  | 2.99  |
| 16           | exch_bases_Mg_spec   | $\text{meq } 100 \text{ g}^{-1}$<br>[= $\text{cmol}(+) \text{ kg}^{-1}$ ] | 156 | 113.56 | 0.80   | 0.71  | 1.87  | 2.33  |
| 17           | exch_bases_Ca_spec   | $\text{meq } 100 \text{ g}^{-1}$<br>[= $\text{cmol}(+) \text{ kg}^{-1}$ ] | 156 | 116.05 | 1.44   | 0.93  | 3.67  | 4.81  |
| 18           | exch_bases_K_spec    | $\text{meq } 100 \text{ g}^{-1}$<br>[= $\text{cmol}(+) \text{ kg}^{-1}$ ] | 156 | 113.86 | 0.20   | 0.53  | 1.46  | 1.47  |
| 19           | exch_acidity_Al_spec | $\text{meq } 100 \text{ g}^{-1}$<br>[= $\text{cmol}(+) \text{ kg}^{-1}$ ] | 156 | 112.40 | 0.88   | 0.82  | 2.39  | 3.62  |
| 20           | Al_py_extract_spec   | %                                                                         | 52  | 71.13  | 0.04   | 0.90  | 3.20  | 3.96  |
| 21           | Al_ox_extract_spec   | %                                                                         | 52  | 68.35  | 0.07   | 0.88  | 2.94  | 4.34  |
| 22           | Al_dcb_extract_spec  | %                                                                         | 52  | 79.98  | 0.30   | 0.97  | 5.53  | 5.62  |
| 23           | Fe_py_extract_spec   | %                                                                         | 52  | 158.74 | 0.17   | 0.67  | 1.76  | 1.20  |
| 24           | Fe_ox_extract_spec   | %                                                                         | 52  | 81.87  | 0.35   | 0.77  | 2.13  | 2.95  |
| 25           | Fe_dcb_extract_spec  | %                                                                         | 52  | 63.57  | 0.69   | 0.95  | 4.38  | 6.37  |
| 26           | Mn_py_extract_spec   | %                                                                         | 52  | 198.30 | 0.02   | 0.56  | 1.53  | 0.55  |
| 27           | Mn_ox_extract_spec   | %                                                                         | 52  | 113.99 | 0.06   | 0.75  | 2.03  | 2.42  |
| 28           | Mn_dcb_extract_spec  | %                                                                         | 52  | 134.49 | 0.02   | 0.87  | 2.84  | 2.68  |
| 29           | Ca_ICPOES_spec       | $\text{mg kg}^{-1}$                                                       | 71  | 155.75 | 0.10   | 0.72  | 1.90  | 1.56  |
| 30           | K_ICPOES_spec        | $\text{mg kg}^{-1}$                                                       | 71  | 82.46  | 0.04   | 0.64  | 1.67  | 0.93  |
| 31           | Mg_ICPOES_spec       | $\text{mg kg}^{-1}$                                                       | 71  | 100.45 | 0.09   | 0.73  | 1.94  | 1.80  |
| 32           | Na_ICPOES_spec       | $\text{mg kg}^{-1}$                                                       | 71  | 88.91  | 0.01   | 0.84  | 2.49  | 3.34  |
| 33           | P_ICPOES_spec        | $\text{mg kg}^{-1}$                                                       | 71  | 91.20  | 0.06   | 0.74  | 1.99  | 1.71  |
| 34           | Ti_ICPOES_spec       | $\text{mg kg}^{-1}$                                                       | 71  | 84.08  | 0.06   | 0.92  | 3.60  | 5.97  |
| 35           | Al_ICPOES_spec       | $\text{g kg}^{-1}$                                                        | 71  | 64.69  | 0.82   | 0.93  | 3.77  | 6.68  |
| 36           | Fe_ICPOES_spec       | $\text{g kg}^{-1}$                                                        | 71  | 46.13  | 0.45   | 0.98  | 7.87  | 12.91 |
| 37           | Mn_ICPOES_spec       | $\text{mg kg}^{-1}$                                                       | 71  | 96.91  | 0.09   | 0.73  | 1.92  | 2.60  |
| 38           | Si_XRF_spec          | %                                                                         | 58  | 25.66  | 0.37   | 0.99  | 11.09 | 13.44 |
| 39           | S_XRF_spec           | $\mu\text{g g}^{-1}$                                                      | 58  | 72.17  | 198.00 | 0.77  | 2.11  | 1.77  |
| 40           | Zr_XRF_spec          | $\mu\text{g g}^{-1}$                                                      | 58  | 24.71  | 46.66  | 0.74  | 1.98  | 1.90  |
| 41           | Ti_XRF_spec          | %                                                                         | 58  | 43.95  | 0.06   | 0.98  | 7.02  | 12.72 |

|    |                          |                           |     |        |        |      |      |       |
|----|--------------------------|---------------------------|-----|--------|--------|------|------|-------|
| 42 | TI_ZR_ratio_spec         | -                         | 58  | 48.95  | 0.00   | 0.99 | 8.31 | 14.01 |
| 43 | clay_SI_ratio_spec       | -                         | 52  | 51.10  | 0.56   | 0.86 | 2.72 | 4.24  |
| 44 | Fe_tot_Fe_dcb_ratio_spec | -                         | 52  | 47.16  | 0.38   | 0.78 | 2.15 | 1.07  |
| 45 | delta_14C_CO2_spec       | ‰                         | 148 | 352.82 | 44.07  | 0.68 | 1.76 | 1.73  |
| 46 | delta_14C_soil_spec      | ‰                         | 160 | 119.35 | 103.54 | 0.69 | 1.79 | 2.02  |
| 47 | FMC_CO2_spec             | %                         | 148 | 7.94   | 0.04   | 0.68 | 1.76 | 1.74  |
| 48 | FMC_soil_spec            | %                         | 160 | 21.99  | 0.10   | 0.69 | 1.79 | 2.02  |
| 49 | Cmass_bulk_spec          | mg C g soil <sup>-1</sup> | 169 | 70.88  | 115.17 | 0.91 | 3.39 | 4.30  |
| 50 | Cmass_CPOM_spec          | mg C g soil <sup>-1</sup> | 166 | 244.41 | 59.34  | 0.33 | 1.23 | 0.41  |
| 51 | Cmass_m_spec             | mg C g soil <sup>-1</sup> | 166 | 90.11  | 77.90  | 0.88 | 2.85 | 2.68  |
| 52 | Cmass_s+c_spec           | mg C g soil <sup>-1</sup> | 166 | 69.30  | 87.65  | 0.72 | 1.90 | 2.22  |
| 53 | Cconc_bulk_spec          | %TC                       | 169 | 73.34  | 0.49   | 0.94 | 4.05 | 4.64  |
| 54 | Cconc_CPOM_spec          | %TC                       | 162 | 153.35 | 2.87   | 0.47 | 1.37 | 0.87  |
| 55 | Cconc_m_spec             | %TC                       | 166 | 80.68  | 0.63   | 0.91 | 3.40 | 3.57  |
| 56 | Cconc_s+c_spec           | %TC                       | 166 | 66.72  | 0.47   | 0.95 | 4.40 | 5.52  |
| 57 | Nmass_bulk_spec          | mg N g soil <sup>-1</sup> | 169 | 74.55  | 10.72  | 0.90 | 3.11 | 3.65  |
| 58 | Nmass_CPOM_spec          | mg N g soil <sup>-1</sup> | 166 | 270.86 | 3.05   | 0.29 | 1.19 | 0.32  |
| 59 | Nmass_m_spec             | mg N g soil <sup>-1</sup> | 166 | 91.48  | 7.26   | 0.85 | 2.61 | 2.66  |
| 60 | Nmass_s+c_spec           | mg N g soil <sup>-1</sup> | 166 | 70.43  | 7.92   | 0.69 | 1.80 | 2.06  |
| 61 | Nconc_bulk_spec          | %TN                       | 169 | 77.13  | 0.05   | 0.90 | 3.23 | 3.34  |
| 62 | Nconc_CPOM_spec          | %TN                       | 162 | 175.39 | 0.12   | 0.48 | 1.39 | 0.65  |
| 63 | Nconc_m_spec             | %TN                       | 166 | 84.11  | 0.06   | 0.88 | 2.90 | 2.83  |
| 64 | Nconc_s+c_spec           | %TN                       | 166 | 67.39  | 0.04   | 0.94 | 4.16 | 4.96  |

\*) Note: The Unit [me 100 g<sup>-1</sup>] is equal to [cmol(+) kg<sup>-1</sup>]

**Table 2.** Statistical performance evaluation for the validation dataset for all measured parameters (n= 26 - 482) described above for TropSOC's soil data and following the workflow suggested by Summerauer et al. (2021). Abbreviations: n= number of observations used; CV = Coefficient of variation;  $R^2$  = explained variation; RMSE = root mean squared error; RPD = Ratio of standard error of performance to standard deviation; RPIQ= ratio of performance to interquartile distance (RPIQ).

| Variable no. | Variable             | Unit                                                                      | n   | CV     | RMSE   | $R^2$ | RPD  | RPIQ |
|--------------|----------------------|---------------------------------------------------------------------------|-----|--------|--------|-------|------|------|
| 3            | BD_spec              | $\text{g cm}^{-3}$                                                        | 482 | 27.56  | 0.30   | 0.43  | 1.32 | 1.63 |
| 4            | clay_spec            | wt %                                                                      | 78  | 36.04  | 5.40   | 0.89  | 3.02 | 4.88 |
| 5            | silt_spec            | wt %                                                                      | 78  | 45.49  | 4.74   | 0.61  | 1.55 | 1.80 |
| 6            | sand_spec            | wt %                                                                      | 78  | 38.12  | 6.55   | 0.81  | 2.25 | 3.89 |
| 7            | pH_KCL_spec          | -                                                                         | 78  | 14.70  | 0.25   | 0.86  | 2.62 | 3.91 |
| 8            | TC_spec              | wt %                                                                      | 101 | 70.94  | 0.53   | 0.90  | 3.20 | 4.00 |
| 9            | TN_spec              | wt %                                                                      | 101 | 70.84  | 0.05   | 0.88  | 2.86 | 3.57 |
| 10           | CN_spec              | -                                                                         | 101 | 127.93 | 9.30   | 0.87  | 2.05 | 0.34 |
| 11           | P_avail_spec         | $\text{mg kg}^{-1}$                                                       | 79  | 165.86 | 31.97  | 0.80  | 2.25 | 1.14 |
| 12           | bases_in_CEC_spec    | %                                                                         | 79  | 87.13  | 11.11  | 0.79  | 2.13 | 3.53 |
| 13           | CEC_spec             | $\text{meq } 100 \text{ g}^{-1}$<br>[= $\text{cmol}(+) \text{ kg}^{-1}$ ] | 78  | 51.02  | 5.00   | 0.86  | 2.50 | 3.38 |
| 14           | bases_in_ECEC_spec   | %                                                                         | 79  | 57.82  | 14.87  | 0.80  | 2.24 | 4.46 |
| 15           | ECEC_spec            | $\text{meq } 100 \text{ g}^{-1}$<br>[= $\text{cmol}(+) \text{ kg}^{-1}$ ] | 79  | 59.17  | 2.21   | 0.84  | 2.31 | 2.69 |
| 16           | exch_bases_Mg_spec   | $\text{meq } 100 \text{ g}^{-1}$<br>[= $\text{cmol}(+) \text{ kg}^{-1}$ ] | 79  | 101.92 | 0.80   | 0.70  | 1.82 | 2.27 |
| 17           | exch_bases_Ca_spec   | $\text{meq } 100 \text{ g}^{-1}$<br>[= $\text{cmol}(+) \text{ kg}^{-1}$ ] | 79  | 102.30 | 1.58   | 0.90  | 2.86 | 3.63 |
| 18           | exch_bases_K_spec    | $\text{meq } 100 \text{ g}^{-1}$<br>[= $\text{cmol}(+) \text{ kg}^{-1}$ ] | 79  | 119.58 | 0.18   | 0.58  | 1.52 | 1.11 |
| 19           | exch_acidity_Al_spec | $\text{meq } 100 \text{ g}^{-1}$<br>[= $\text{cmol}(+) \text{ kg}^{-1}$ ] | 79  | 121.69 | 0.90   | 0.75  | 1.96 | 3.10 |
| 20           | Al_py_extract_spec   | %                                                                         | 27  | 81.54  | 0.06   | 0.81  | 2.30 | 3.26 |
| 21           | Al_ox_extract_spec   | %                                                                         | 27  | 69.80  | 0.11   | 0.72  | 1.87 | 2.20 |
| 22           | Al_dcb_extract_spec  | %                                                                         | 27  | 57.03  | 0.70   | 0.72  | 1.61 | 1.99 |
| 23           | Fe_py_extract_spec   | %                                                                         | 27  | 117.14 | 0.16   | 0.59  | 1.43 | 1.60 |
| 24           | Fe_ox_extract_spec   | %                                                                         | 27  | 89.71  | 0.53   | 0.61  | 1.60 | 1.56 |
| 25           | Fe_dcb_extract_spec  | %                                                                         | 27  | 58.76  | 0.60   | 0.96  | 4.63 | 7.68 |
| 26           | Mn_py_extract_spec   | %                                                                         | 27  | 177.87 | 0.03   | 0.36  | 1.26 | 0.47 |
| 27           | Mn_ox_extract_spec   | %                                                                         | 27  | 107.84 | 0.08   | 0.59  | 1.57 | 1.76 |
| 28           | Mn_dcb_extract_spec  | %                                                                         | 27  | 106.21 | 0.02   | 0.79  | 2.12 | 1.94 |
| 29           | Ca_ICPOES_spec       | $\text{mg kg}^{-1}$                                                       | 36  | 147.03 | 0.12   | 0.65  | 1.69 | 1.64 |
| 30           | K_ICPOES_spec        | $\text{mg kg}^{-1}$                                                       | 36  | 88.39  | 0.05   | 0.69  | 1.70 | 0.91 |
| 31           | Mg_ICPOES_spec       | $\text{mg kg}^{-1}$                                                       | 36  | 97.11  | 0.13   | 0.72  | 1.80 | 1.68 |
| 32           | Na_ICPOES_spec       | $\text{mg kg}^{-1}$                                                       | 36  | 79.53  | 0.01   | 0.84  | 2.50 | 3.20 |
| 33           | P_ICPOES_spec        | $\text{mg kg}^{-1}$                                                       | 36  | 72.36  | 0.06   | 0.76  | 1.75 | 2.41 |
| 34           | Ti_ICPOES_spec       | $\text{mg kg}^{-1}$                                                       | 36  | 81.34  | 0.07   | 0.92  | 3.48 | 5.12 |
| 35           | Al_ICPOES_spec       | $\text{g kg}^{-1}$                                                        | 36  | 59.89  | 1.17   | 0.89  | 2.75 | 4.93 |
| 36           | Fe_ICPOES_spec       | $\text{g kg}^{-1}$                                                        | 36  | 40.27  | 0.84   | 0.94  | 3.87 | 6.72 |
| 37           | Mn_ICPOES_spec       | $\text{mg kg}^{-1}$                                                       | 36  | 75.20  | 0.09   | 0.59  | 1.16 | 1.98 |
| 38           | Si_XRF_spec          | %                                                                         | 29  | 22.52  | 0.93   | 0.93  | 3.72 | 4.20 |
| 39           | S_XRF_spec           | $\mu\text{g g}^{-1}$                                                      | 29  | 100.93 | 383.82 | 0.69  | 1.56 | 0.55 |
| 40           | Zr_XRF_spec          | $\mu\text{g g}^{-1}$                                                      | 29  | 26.47  | 77.53  | 0.41  | 1.33 | 0.99 |
| 41           | Ti_XRF_spec          | %                                                                         | 29  | 39.24  | 0.11   | 0.92  | 3.36 | 5.41 |



|    |                          |                           |    |        |        |      |      |      |
|----|--------------------------|---------------------------|----|--------|--------|------|------|------|
| 42 | Tl_ZR_ratio_spec         | -                         | 29 | 50.52  | 0.00   | 0.92 | 3.49 | 6.08 |
| 43 | clay_SI_ratio_spec       | -                         | 26 | 48.77  | 0.79   | 0.77 | 2.08 | 3.94 |
| 44 | Fe_tot_Fe_dcb_ratio_spec | -                         | 27 | 44.22  | 0.36   | 0.81 | 2.16 | 1.23 |
| 45 | delta_14C_CO2_spec       | ‰                         | 74 | 414.37 | 40.41  | 0.34 | 1.15 | 1.49 |
| 46 | delta_14C_soil_spec      | ‰                         | 80 | 111.32 | 124.71 | 0.50 | 1.40 | 1.80 |
| 47 | FMC_CO2_spec             | %                         | 74 | 4.71   | 0.04   | 0.34 | 1.15 | 1.49 |
| 48 | FMC_soil_spec            | %                         | 80 | 20.63  | 0.13   | 0.50 | 1.40 | 1.81 |
| 49 | Cmass_bulk_spec          | mg C g soil <sup>-1</sup> | 85 | 63.80  | 125.86 | 0.85 | 2.57 | 3.14 |
| 50 | Cmass_CPOM_spec          | mg C g soil <sup>-1</sup> | 84 | 189.40 | 44.84  | 0.26 | 1.13 | 0.58 |
| 51 | Cmass_m_spec             | mg C g soil <sup>-1</sup> | 84 | 80.71  | 92.06  | 0.76 | 2.06 | 2.13 |
| 52 | Cmass_s+c_spec           | mg C g soil <sup>-1</sup> | 84 | 59.65  | 78.17  | 0.69 | 1.81 | 2.44 |
| 53 | Cconc_bulk_spec          | %TC                       | 85 | 64.68  | 0.57   | 0.86 | 2.66 | 3.31 |
| 54 | Cconc_CPOM_spec          | %TC                       | 82 | 142.08 | 3.48   | 0.35 | 1.22 | 0.97 |
| 55 | Cconc_m_spec             | %TC                       | 84 | 71.67  | 0.60   | 0.88 | 2.92 | 3.16 |
| 56 | Cconc_s+c_spec           | %TC                       | 84 | 60.96  | 0.41   | 0.95 | 4.45 | 6.15 |
| 57 | Nmass_bulk_spec          | mg N g soil <sup>-1</sup> | 85 | 60.44  | 11.80  | 0.80 | 2.20 | 3.10 |
| 58 | Nmass_CPOM_spec          | mg N g soil <sup>-1</sup> | 84 | 181.25 | 1.77   | 0.27 | 1.10 | 0.57 |
| 59 | Nmass_m_spec             | mg N g soil <sup>-1</sup> | 84 | 78.18  | 7.18   | 0.78 | 2.13 | 2.38 |
| 60 | Nmass_s+c_spec           | mg N g soil <sup>-1</sup> | 84 | 57.58  | 7.20   | 0.65 | 1.66 | 2.50 |
| 61 | Nconc_bulk_spec          | %TN                       | 85 | 61.81  | 0.05   | 0.82 | 2.29 | 2.81 |
| 62 | Nconc_CPOM_spec          | %TN                       | 81 | 148.58 | 0.15   | 0.42 | 1.27 | 0.85 |
| 63 | Nconc_m_spec             | %TN                       | 84 | 69.55  | 0.06   | 0.86 | 2.54 | 3.18 |
| 64 | Nconc_s+c_spec           | %TN                       | 84 | 60.87  | 0.04   | 0.93 | 3.59 | 4.60 |

\*) Note: The Unit [meq 100 g<sup>-1</sup>] is equal to [cmol(+) kg<sup>-1</sup>]

## Acknowledgment

TropSOC was funded via the Emmy-Noether-Program of the German Research Foundation (project ID 387472333).

## References

- Baumann, P.: simplerspec: Soil and plant spectroscopic model building and prediction, <https://github.com/philipp-baumann/simplerspec>, R package version 0.1.0.9001, 2020.
- Naes, T., Isaksson, T., Fearn, T., and Davies, T., A user friendly guide to multivariate calibration and classification. NIR Publications, Chichester, United Kingdom.
- Kuhn, M. (2020). caret: Classification and Regression Training. R package version 6.0-86. <https://CRAN.R-project.org/package=caret>, 2002.
- Stevens, A. and Ramirez-Lopez, L.: prospectr: Miscellaneous Functions for Processing and Sample Selection of Spectroscopic Data, <https://CRAN.R-project.org/package=prospectr>, R package version 0.2.0, 2020.
- Summerauer, L., Baumann, P., Ramirez-Lopez, L., Barthel, M., Bauters, M., Bukombe, B., Reichenbach, M., Boeckx, P., Kearsley, E., Van Oost, K., Vanlauwe, B., Chiragaga, D., Heri-Kazi, A.B., Moonen, P., Sila, A., Shepherd, K., Mujinya, B.B., Van Ranst, E., Baert, G., Doetterl, S. and Six, J.: A spectral platform for soil properties of central Africa, SOIL DISCUSSIONS (in review), 2021.
- R Core Team: R: A Language and Environment for Statistical Computing, R Foundation for Statistical Computing, Vienna, Austria, <https://www.R-project.org/>, 2020.
- Ramirez-Lopez, L.: resemble: Regression and Similarity Evaluation for Memory-Based Learning in Spectral Chemometrics, <https://CRAN.R-project.org/package=resemble>, R package version 2.1.1, 2020.
