# Supplementary material for: Organic matter cycling along geochemical, geomorphic, and disturbance gradients in forest and cropland of the African Tropics – project TropSOC database version 1.0
Source: Copernicus journal article supplement (doi:10.5194/essd-13-4133-2021), 2021-08-25
Supplement: Supplementary file 27 [file essd-13-4133-2021-supplement.zip]

## TropSOC Database

### 2.7. Forest – Soil Profile Descriptions

When using these data, please cite the database and the key publication in ESSD:

Doetterl, S.; Bukombe, B.; Cooper, M.; Kidinda, L.; Muhindo, D.; Reichenbach, M.; Stegmann, A.; Summerauer, L.; Wilken, F.; Fiener, P. (2021): TropSOC Database. V. 1.0. GFZ Data Services.

<https://doi.org/10.5880/fidgeo.2021.009>

Licence: Creative Commons Attribution 4.0 International ([CC BY 4.0](https://creativecommons.org/licenses/by/4.0/))

Doetterl S., Asifiwe R.K., Baert G., Bamba F., Bauters M., Boeckx P., Bukombe B., Cadisch G., Cizungu L.N., Cooper M., Hoyt A., Kabaseke C., Kalbitz K., Kidinda L., Maier A., Mainka M., Mayrock J., Muhindo D., Mujinya B.B., Mukotanyi, S.M., Nabahungu L., Reichenbach M., Rewald B., Six J., Stegmann A., Summerauer L., Unseld R., Vanlauwe B., Van Oost K., Verheyen K. Vogel C., Wilken F., Fiener P. Organic matter cycling along geochemical, geomorphic and disturbance gradients in forests and cropland of the African Tropics - Project TropSOC Database Version 1.0. *Earth System Science Data*. <https://doi.org/10.5194/essd-2021-73>, 2021.

#### Introduction

The dataset comprises a unique plot identifier and 64 variables resulting from the standardized soil profile description following the methods of the FAO (2006). Abbreviations are given in FAO (2006), which is freely available under

<http://www.fao.org/publications/card/en/c/903943c7-f56a-521a-8d32-459e7e0cdae9/>

With updated soil classifications following the WRB classification in FAO (2015) available at:

<http://www.fao.org/3/i3794en/i3794en.pdf>

Missing values are indicated by -9999.

#### Data structure

| No. | Variable        | Explanation                                                        | Unit       |
|-----|-----------------|--------------------------------------------------------------------|------------|
| 1   | plotID          | unique identifier of each plot and point where data were collected | -          |
| 2   | horizonID       | numbering of horizons; 1 is topsoil horizon                        | -          |
| 3   | date            | date when description was made                                     | dd.mm.yyyy |
| 4   | authors         | names of researchers that conducted the field survey               | -          |
| 5   | weather         | weather condition during the soil profile description              | -          |
| 6   | landform        | major landform on which the soil profile is located                | -          |
| 7   | position        | position of the soil profile on the major landform                 | -          |
| 8   | slope           | form of the slope on which the soil profile is located             | -          |
| 9   | landuse         | land use at soil profile                                           | -          |
| 10  | vegetation      | vegetation around the soil profile                                 | -          |
| 11  | human_influence | human influence around the soil profile                            | -          |
| 12  | parent_material | parent material in which pedogenesis took place                    | -          |
| 13  | rock_cover      | surface covered by rock outcrops around the soil profile           | -          |
| 14  | rock_frag_cover | surface covered by rock fragments around the soil profile          | -          |
| 15  | surface_sealing | thickness of surface sealing around the soil profile               | -          |
| 16  | cracks          | width of cracks around the soil profile                            | -          |

|    |                           |                                                                                                                     |    |
|----|---------------------------|---------------------------------------------------------------------------------------------------------------------|----|
| 17 | surface_characteristics   | other surface characteristics around the soil profile                                                               | -  |
| 18 | erosion_category          | main categories of soil erosion around the soil profile                                                             | -  |
| 19 | erosion_area              | area affected by soil erosion around the soil profile                                                               | -  |
| 20 | erosion_degree            | severity of soil erosion around the soil profile                                                                    | -  |
| 21 | erosion_activity          | period of activity of soil erosion around the soil profile                                                          | -  |
| 22 | horizon_cap               | pedogenetic horizons (capital letter) which are defined by physical features like colour and texture                | -  |
| 23 | horizon_suffix            | specific kinds of master horizons (suffix of capital letter)                                                        | -  |
| 24 | horizon_top               | upper depth of the sampled horizon                                                                                  | cm |
| 25 | horizon_bot               | lower depth of the sampled horizon                                                                                  | cm |
| 26 | full_profile_depth        | total depths of the described profile mineral soil horizons                                                         | cm |
| 27 | comments_notes            | any further comments about the described horizon                                                                    | -  |
| 28 | distinctness              | distinctness of the zone in which the horizon boundary can be located without being in one of the adjacent horizons | -  |
| 29 | horizon_topography        | smoothness of the depth variation of the boundary                                                                   | -  |
| 30 | cabonates                 | abundance of carbonates in a given horizon                                                                          | -  |
| 31 | class_rock_fragments      | rock fragment classification by its diameter                                                                        | -  |
| 32 | abun_rock_fragments       | abundance of rock fragments                                                                                         | -  |
| 33 | shape_rock_fragments      | shape of rock fragments                                                                                             | -  |
| 34 | weathering_rock_fragments | weathering degree of rock fragments                                                                                 | -  |
| 35 | nature_rock_fragments     | primary mineral content of rock fragments                                                                           | -  |
| 36 | class_artefacts           | artefact classification by its diameter                                                                             | -  |
| 37 | abundance_artefacts       | abundance of artefacts                                                                                              | -  |
| 38 | shape_artefacts           | shape of artefacts                                                                                                  | -  |
| 39 | weathering_artefacts      | weathering degree of artefacts                                                                                      | -  |
| 40 | nature_artefacts          | nature of the artefacts (for example charcoal, potshers etc.)                                                       | -  |
| 41 | soil_colour_matrix        | colour of the soil matrix                                                                                           | -  |
| 42 | munsell_colour_wet        | munsell colour chart on homogenized field wet samples under stable light conditions in the lab                      | -  |
| 43 | abundance_mottling        | abundance of mottles                                                                                                | -  |
| 44 | grade_aggregates          | development of the soil particles into discrete soil units / aggregates resulting from pedogenic processes          | -  |
| 45 | type_aggregates           | shape and formation of soil aggregates                                                                              | -  |
| 46 | size_aggregates           | size of soil aggregates based on their diameter                                                                     | -  |
| 47 | cons_wet_aggregates       | degree of cohesion or adhesion of the soil mass when wet                                                            | -  |
| 48 | stickiness_aggregates     | quality of adhesion of the soil material to other objects                                                           | -  |
| 49 | plasticity_aggregates     | plasticity of the soil, i.e. the ability of the soil material to change shape continuously                          | -  |
| 50 | type_voids                | shape and origin of the voids (empty spaces) in the soil matrix                                                     | -  |
| 51 | size_voids                | size of the voids based on their diameter                                                                           | -  |
| 52 | abundance_voids           | abundance of voids                                                                                                  | -  |

|    |                       |                                                                                                                                                                        |   |
|----|-----------------------|------------------------------------------------------------------------------------------------------------------------------------------------------------------------|---|
| 53 | abundance_coatings    | abundance of illuviation features, coatings of other composition and reorientations and concentrations associated with surfaces occurring as stains in the soil matrix | - |
| 54 | abundance_concretion  | abundance of mineral concretions                                                                                                                                       | - |
| 55 | size_diameter_roots   | size class of the roots by their diameter                                                                                                                              | - |
| 56 | abundance_roots       | abundance of roots                                                                                                                                                     | - |
| 57 | abundance_biol_act    | abundance of biological activities                                                                                                                                     | - |
| 58 | biol_act              | nature of biological activities                                                                                                                                        | - |
| 59 | diagnostic_horizon    | pedogenic horizon characterized by a combination of attributes that reflect widespread common results of pedogenic processes                                           | - |
| 60 | diagnostic_properties | properties within the soil profile which is characterized by a combination of attributes that reflect widespread common result of pedogenic processes                  | - |
| 61 | diagnostic_materials  | diagnostic material like a specific parent material or the alteration of materials that is characteristic for specific soil types                                      | - |
| 62 | reference_soil_group  | soil types which can be differentiated by characteristic soil features produced by primary pedogenetic processes                                                       | - |
| 63 | principal_qualifiers  | Main and 1 <sup>st</sup> ranked qualifiers                                                                                                                             | - |
| 64 | editor                | name of the person who conducted the analysis                                                                                                                          | - |
| 65 | institute             | name of the institute where the analysis was conducted out                                                                                                             | - |

### **Methods**

Soil profile descriptions follow methods and WRB soil classification as presented in FAO (2006) and FAO (2015).

### **Acknowledgment**

TropSOC was funded via the Emmy-Noether-Program of the German Research Foundation (project ID 387472333).

### **References**

- FAO: Guidelines for soil description, 4th ed., Food and Agriculture Organization of the United Nations, Rome, Italy, 97 pp., 2006.
- FAO. World reference base for soil resources 2014. Update 2015. Food and Agriculture Organization of the United Nations, Rome, Italy, 203 pp., 2015.
