# Supplementary material for: Organic matter cycling along geochemical, geomorphic, and disturbance gradients in forest and cropland of the African Tropics – project TropSOC database version 1.0
Source: Copernicus journal article supplement (doi:10.5194/essd-13-4133-2021), 2021-08-25
Supplement: Supplementary file 30 [file essd-13-4133-2021-supplement.zip]

## TropSOC Database

### 2.1.7. Forest – Vegetation – Litter fall aggregated to annual values

When using these data, please cite the database and the key publication in ESSD:

Doetterl, S.; Bukombe, B.; Cooper, M.; Kidinda, L.; Muhindo, D.; Reichenbach, M.; Stegmann, A.; Summerauer, L.; Wilken, F.; Fiener, P. (2021): TropSOC Database. V. 1.0. GFZ Data Services.

<https://doi.org/10.5880/fidgeo.2021.009>

Licence: Creative Commons Attribution 4.0 International ([CC BY 4.0](https://creativecommons.org/licenses/by/4.0/))

Doetterl S., Asifiwe R.K., Baert G., Bamba F., Bauters M., Boeckx P., Bukombe B., Cadisch G., Cizungu L.N., Cooper M., Hoyt A., Kabaseke C., Kalbitz K., Kidinda L., Maier A., Mainka M., Mayrock J., Muhindo D., Mujinya B.B., Mukotanyi, S.M., Nabahungu L., Reichenbach M., Rewald B., Six J., Stegmann A., Summerauer L., Unseld R., Vanlauwe B., Van Oost K., Verheyen K. Vogel C., Wilken F., Fiener P. Organic matter cycling along geochemical, geomorphic and disturbance gradients in forests and cropland of the African Tropics - Project TropSOC Database Version 1.0. *Earth System Science Data*. <https://doi.org/10.5194/essd-2021-73>, 2021.

### Introduction

The dataset comprises a unique plot identifier, followed by six variables that describe data of litterfall monitoring aggregated for annual values at the plot level for TropSOC's forest plots.

### Data structure

| No. | Variable    | Explanation                                                        | Unit                                   |
|-----|-------------|--------------------------------------------------------------------|----------------------------------------|
| 1   | plotID      | unique identifier of each plot and point where data were collected | -                                      |
| 2   | min_litter  | minimum daily litterfall production per year                       | Mg ha <sup>-1</sup> day <sup>-1</sup>  |
| 3   | max_litter  | maximum daily litterfall production per year                       | Mg ha <sup>-1</sup> day <sup>-1</sup>  |
| 4   | mean_litter | mean daily litterfall production per year                          | Mg ha <sup>-1</sup> day <sup>-1</sup>  |
| 5   | sd_litter   | standard deviation of mean daily litterfall production per year    | Mg ha <sup>-1</sup> day <sup>-1</sup>  |
| 6   | sum_litter  | sum of litterfall production per year                              | Mg ha <sup>-1</sup> year <sup>-1</sup> |
| 7   | no          | total number of observations per year considered in calculations   | -                                      |

### Methods

This data set comprises an annual aggregation of the litter data (215\_litter.csv) described in detail in 215\_litter.pdf.

### Acknowledgment

TropSOC was funded via the Emmy-Noether-Program of the German Research Foundation (project ID 387472333).
