# Supplementary material for: Organic matter cycling along geochemical, geomorphic, and disturbance gradients in forest and cropland of the African Tropics – project TropSOC database version 1.0
Source: Copernicus journal article supplement (doi:10.5194/essd-13-4133-2021), 2021-08-25
Supplement: Supplementary file 39 [file essd-13-4133-2021-supplement.zip]

## TropSOC Database

### 2.1.12. Forest – Vegetation – Root productivity aggregated to seasonal values

When using these data, please cite the database and the key publication in ESSD:

Doetterl, S.; Bukombe, B.; Cooper, M.; Kidinda, L.; Muhindo, D.; Reichenbach, M.; Stegmann, A.; Summerauer, L.; Wilken, F.; Fiener, P. (2021): TropSOC Database. V. 1.0. GFZ Data Services.

<https://doi.org/10.5880/fidgeo.2021.009>

Licence: Creative Commons Attribution 4.0 International ([CC BY 4.0](https://creativecommons.org/licenses/by/4.0/))

Doetterl S., Asifiwe R.K., Baert G., Bamba F., Bauters M., Boeckx P., Bukombe B., Cadisch G., Cizungu L.N., Cooper M., Hoyt A., Kabaseke C., Kalbitz K., Kidinda L., Maier A., Mainka M., Mayrock J., Muhindo D., Mujinya B.B., Mukotanyi, S.M., Nabahungu L., Reichenbach M., Rewald B., Six J., Stegmann A., Summerauer L., Unseld R., Vanlauwe B., Van Oost K., Verheyen K. Vogel C., Wilken F., Fiener P. Organic matter cycling along geochemical, geomorphic and disturbance gradients in forests and cropland of the African Tropics - Project TropSOC Database Version 1.0. *Earth System Science Data*. <https://doi.org/10.5194/essd-2021-73>, 2021.

#### Introduction

The data set comprises a unique plot identifier, information regarding season, and six further variables that provide data regarding the root productivity aggregated for different seasons at the plot level for TropSOC's forest plots.

#### Data structure

| No. | Variable | Explanation                                                                                                                                                         | Unit                                     |
|-----|----------|---------------------------------------------------------------------------------------------------------------------------------------------------------------------|------------------------------------------|
| 1   | plotID   | unique identifier of each plot and point where data were collected                                                                                                  | -                                        |
| 2   | season   | season represented by the data. main seasons divided by precipitation; weak_dry: Dec – Feb; strong_rain: March – May; strong_dry: June – Aug; weak_rain: Sep – Nov) | -                                        |
| 3   | min_bio  | minimum fine root (< 2 mm) biomass productivity                                                                                                                     | kg ha <sup>-1</sup> day <sup>-1</sup>    |
| 4   | max_bio  | maximum fine root (< 2 mm) biomass productivity                                                                                                                     | kg ha <sup>-1</sup> day <sup>-1</sup>    |
| 5   | mean_bio | mean fine root (< 2 mm) biomass productivity                                                                                                                        | kg ha <sup>-1</sup> day <sup>-1</sup>    |
| 6   | sd_bio   | standard deviation of mean fine root (< 2 mm) biomass productivity                                                                                                  | kg ha <sup>-1</sup> day <sup>-1</sup>    |
| 7   | sum_bio  | sum of fine root (< 2 mm) biomass productivity                                                                                                                      | kg ha <sup>-1</sup> season <sup>-1</sup> |
| 8   | no       | total number of observations per season considered in calculations                                                                                                  | -                                        |

#### Methods

This data set comprises a seasonal aggregation of the root productivity data (*2111\_root\_prod.csv*) describe in detail in *2111\_root\_prod.pdf*. The data were aggregated at the plot level in four seasons, which were categorized based on the average precipitation for each period: weak dry season (December-February), strong rain season (March-May), strong dry season (June-August) and weak rain season (September-November).

#### Acknowledgment

TropSOC was funded via the Emmy-Noether-Program of the German Research Foundation (project ID 387472333).
