# Supplementary material for: Organic matter cycling along geochemical, geomorphic, and disturbance gradients in forest and cropland of the African Tropics – project TropSOC database version 1.0
Source: Copernicus journal article supplement (doi:10.5194/essd-13-4133-2021), 2021-08-25
Supplement: Supplementary file 42 [file essd-13-4133-2021-supplement.zip]

## TropSOC Database

### 4.3. Meteorological data – High resolution 5 min triggered precipitation data

When using these data, please cite the database and the key publication in ESSD:

Doetterl, S.; Bukombe, B.; Cooper, M.; Kidinda, L.; Muhindo, D.; Reichenbach, M.; Stegmann, A.; Summerauer, L.; Wilken, F.; Fiener, P. (2021): TropSOC Database. V. 1.0. GFZ Data Services.

<https://doi.org/10.5880/fidgeo.2021.009>

Licence: Creative Commons Attribution 4.0 International ([CC BY 4.0](https://creativecommons.org/licenses/by/4.0/))

Doetterl S., Asifiwe R.K., Baert G., Bamba F., Bauters M., Boeckx P., Bukombe B., Cadisch G., Cizungu L.N., Cooper M., Hoyt A., Kabaseke C., Kalbitz K., Kidinda L., Maier A., Mainka M., Mayrock J., Muhindo D., Mujinya B.B., Mukotanyi, S.M., Nabahungu L., Reichenbach M., Rewald B., Six J., Stegmann A., Summerauer L., Unseld R., Vanlauwe B., Van Oost K., Verheyen K. Vogel C., Wilken F., Fiener P. Organic matter cycling along geochemical, geomorphic and disturbance gradients in forests and cropland of the African Tropics - Project TropSOC Database Version 1.0. *Earth System Science Data*. <https://doi.org/10.5194/essd-2021-73>, 2021.

#### Introduction

The file comprises a unique station identifier and 6 variables related to triggered precipitation from six meteorological stations. The triggered precipitation data represents the unmodified, but quality checked precipitation data recorded from August 2018 to November 2020. For the geographic locations of the stations please see *410\_meteo\_locations.csv* and *410\_meteo\_locations.pdf*.

#### Data structure

| No. | Variable     | Explanation                                                                      | Unit             |
|-----|--------------|----------------------------------------------------------------------------------|------------------|
| 1   | stationID    | identification number of the stations as given in <i>410_meteo_locations.csv</i> | -                |
| 2   | station_name | station name as given in <i>410_meteo_locations.csv</i>                          | -                |
| 3   | date_time    | date and time of precipitation record                                            | dd.mm.yyyy hh:mm |
| 4   | year         | year of record                                                                   | yyyy             |
| 5   | month        | month of record                                                                  | mm               |
| 6   | day          | day of record                                                                    | dd               |
| 7   | pcp          | precipitation within specific five-minute interval                               | mm               |

## Methods

The precipitation sums of a five-minute interval that collected precipitation (tipping bucket tilts) was recorded. Hence, intervals without precipitation are not shown. Please find a list of data gaps that exceed a duration of 30 minutes below (Tab. 1). Figure 1 provides cumulative sums of rainfall intensities to illustrate seasonality and qualitative data validation. Please note that rainfall intensities for Bugulumiza station are low for the period 28.10.2018 to 26.08.2019. **We advise not to use the data recorded for rainfall intensities in this period for Bugulumiza station.** If you so, please handle this period with care, as unusually long periods of low intensities can be an indication for a partly blocked outlet of the rain gauge.

**Table 1:** Data gaps of triggered precipitation monitoring at six stations.

| Station name | Gap start time   | Gap stop time    |
|--------------|------------------|------------------|
| Bugulumiza   | 01.02.2019 00:05 | 31.05.2019 00:00 |
| Bugulumiza   | 10.12.2019 00:00 | 11.12.2019 23:55 |
| Bugulumiza   | 28.12.2019 22:35 | 28.12.2019 23:35 |
| Bugulumiza   | 18.03.2020 00:00 | 21.05.2020 23:55 |
| Bugulumiza   | 13.07.2020 04:30 | 09.11.2020 06:35 |
| Bukavu       | 06.03.2018 14:05 | 25.08.2018 06:45 |
| Bukavu       | 28.06.2019 07:20 | 28.06.2019 12:15 |
| Bukavu       | 08.08.2019 10:30 | 09.11.2020 06:35 |
| Kibale       | 06.03.2018 14:05 | 24.06.2018 17:15 |
| Kibale       | 26.06.2018 22:25 | 26.06.2018 23:20 |
| Kibale       | 07.12.2018 11:35 | 12.12.2018 15:20 |
| Kibale       | 12.02.2019 14:05 | 24.03.2019 11:35 |
| Kibale       | 24.03.2019 22:30 | 24.03.2019 23:55 |
| Kibale       | 10.07.2019 14:10 | 20.08.2019 15:35 |
| Kibale       | 18.09.2019 13:35 | 02.10.2019 14:00 |
| Kibale       | 14.11.2019 11:35 | 25.11.2019 11:20 |
| Kibale       | 21.12.2019 16:45 | 19.03.2020 11:45 |
| Kibale       | 25.05.2020 12:15 | 12.08.2020 09:50 |
| Kibale       | 29.09.2020 11:25 | 09.11.2020 06:35 |
| Lukananda    | 06.03.2018 14:05 | 28.06.2019 12:15 |
| Lukananda    | 25.10.2019 19:40 | 10.11.2019 12:30 |
| Lukananda    | 10.12.2019 00:00 | 11.12.2019 23:55 |
| Lukananda    | 13.07.2020 08:15 | 09.11.2020 06:35 |
| Walungu      | 06.03.2018 14:05 | 20.08.2018 16:55 |
| Walungu      | 10.10.2018 06:55 | 17.11.2018 08:15 |
| Walungu      | 29.12.2018 11:30 | 29.12.2018 12:15 |
| Walungu      | 01.03.2019 21:25 | 06.04.2019 12:05 |
| Walungu      | 28.08.2019 12:25 | 30.09.2019 12:20 |
| Walungu      | 03.03.2020 12:10 | 25.04.2020 12:35 |
| Walungu      | 27.06.2020 12:55 | 31.07.2020 12:05 |

### **Acknowledgment**

TropSOC was funded via the Emmy-Noether-Program of the German Research Foundation (project ID 387472333). Micrometeorological data from three of our weather stations (Bukavu, Lukananda, Bugulumiza) were made available and are administered by the Trans-African Hydro-Meteorological Observatory (TAHMO). New and additional data can be acquired at <https://tahmo.org>.
